# Supplementary material
Source: PubMed Central journal article supplement (PMC4527561)
Supplement: NIHMS709839-supplement-2.pdf [file NIHMS709839-supplement-2.pdf]

# Supplemental material: Transition to chaos in random networks with cell-type-specific connectivity

Johnatan Aljadeff, Merav Stern, Tatyana Sharpee

## S1 Largest Lyapunov exponent

We used the standard method [1] to compute the largest Lyapunov exponent for the system parameterized as follows:  $D = 2$ ,  $\alpha_1 = \alpha_2 = \frac{1}{2}$  and

$$\mathbf{g} = \begin{pmatrix} \kappa/2 & 1/2 \\ 2 & \kappa/2 \end{pmatrix}. \quad (\text{S1})$$

When  $\kappa$  is varied between 0.3 and 3,  $\Lambda_1$  varies between 0.71 and 1.27. For this parametrization, the average synaptic gain  $\bar{g} = (\sum_{c,d=1}^D \alpha_c \alpha_d g_{cd}^2)^{\frac{1}{2}}$  is greater than 1 for all values of  $\kappa$  in that range (see Fig. S1). Since  $N$  is finite the transition does not occur exactly at  $\Lambda_1 = 1$ . It is however in excellent agreement with the Lyapunov exponent for the single cell-type ( $D = 1$ ) system (when  $N$  is the same for the two networks and  $g$  is matched to  $\sqrt{\Lambda_1}$ ).

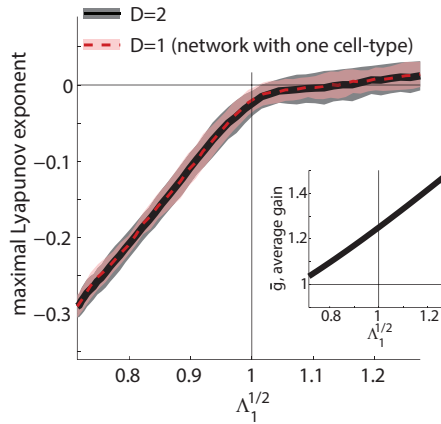

Figure S1: The maximal Lyapunov exponent for 25 realizations in each value of  $\Lambda_1$  for a family of  $D = 2$  networks (parameters in text) compared with a network with a single cell-type ( $D = 1$ ). Inset: the value of the average synaptic gain  $\bar{g}$  is always greater than 1 for this parametrization.

## S2 Universality and sparsity

In the main text we have discussed connectivity matrices with elements drawn from Gaussian distributions. However, Girko's circular law is universal, meaning that the

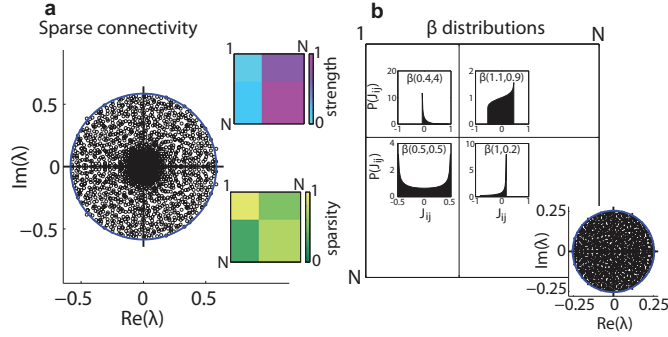

Figure S2: Universality and sparse connectivity. (a) Our results extend to sparse connectivity matrices, an example matrix with non-Gaussian element distributions. The formula for the radius (blue circle) is in agreement with the numerical results. Insets shows average synaptic strengths,  $\mathbf{G}$  (top) and the sparsity levels (bottom). (b) In each block the elements of  $\mathbf{J}$  were drawn from a centered  $\beta$  distribution with different parameters leading to skewed and bimodal distributions.

spectral density of connectivity matrices describing single cell-type networks depends only on the second moment of the matrix entry distribution [2] (as long as the mean remains zero). This suggests that our results for matrices with block structured variances, extend to non-Gaussian distributions, provided that  $\langle J_{ij} \rangle = 0$  and  $N \langle J_{ij}^2 \rangle = g_{c_i d_j}^2 < \infty$ .

Using numerical simulations, we have verified that the formula for the spectral radius (Eq. (8) in the main text) holds for a number of non-Gaussian matrix element distributions, including networks where connection strengths were taken from sparse and  $\beta$  distributions (Fig. S2). In the sparse example,  $s_{cd}$  is the fraction of nonzero elements, randomly drawn from a Gaussian distribution with variance  $g_{cd}^2/N$ . The block-wise variance is therefore  $s_{cd}g_{cd}^2/N$ , and eigenvalues are bounded by a circle with radius calculated using  $M_{cd} = \alpha_d s_{cd} g_{cd}^2$ .

### S3 Effective and average synaptic gain

We now demonstrate that the network with cell-type dependent connectivity, and specifically our simplified model of adult neurogenesis, can have an increased computational capacity when compared to a network with a single cell type. In the main text we show that the effective gain,  $\sqrt{\Lambda_1}$ , serves as a good coordinate to describe the network's capacity to perform computational tasks. We have also shown that  $\sqrt{\Lambda_1}$  is in general different from the average synaptic gain in the network,  $\bar{g}$ . The average gain is the gain one would get by starting with a network with cell-type dependent connectivity and randomly permuting all the entries of the connectivity matrix.

A simple calculation shows that for the parametrization  $(\alpha_1, \gamma, \epsilon)$ , for any  $\alpha_1 \in (0, 1)$  and for any  $\gamma > (1 - \epsilon) > 0$  the effective gain is larger than the average gain. We plot

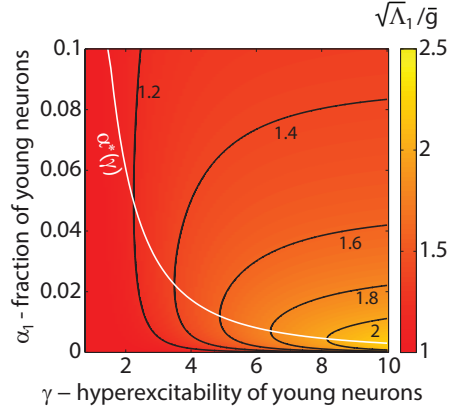

Figure S3: Ratio of effective and average synaptic gain in a simplified model of adult neurogenesis. In the entire  $\gamma - \alpha_1$  plane  $\sqrt{\Lambda_1}/\bar{g} > 1$ . This ratio is equal to 1 by definition for  $\alpha_1 = 0$  and  $\alpha_1 = 1$  (networks with one group of neurons). In black we plot the contour lines of the ratio and in white we plot  $\alpha^*(\gamma)$ , the value of  $\alpha_1$  such that the ratio is maximal for a given  $\gamma$ .

the ratio  $\sqrt{\Lambda_1}/\bar{g}$  for fixed  $\epsilon = 0.2$  and  $\alpha_1, \gamma$  in the same range used in the main text ( $\alpha_1$  is extended to 0).

## References

- [1] A. Wolf, J. B. Swift, H. L. Swinney, and J. A. Vastano, *Physica D: Nonlinear Phenomena* **16**, 285 (1985).
- [2] T. Tao, V. Vu, and M. Krishnapur, *The Annals of Probability* **38**, 2023 (2010).
